# Supplementary material for: Actinide tetracyanoplatinates: synthesis and structural characterization with uncharacteristic Th–NC coordination and thorium fluorescence
Source: Royal Society of Chemistry journal article supplement (doi:10.1039/c0cc00343c), 2010-01-01
Supplement: c0cc00343c.pdf [file c0cc00343c.pdf]

Supporting Information for

# Actinide Tetracyanoplatinates: Synthesis and Structural Characterization Featuring Unique Fluorescent Properties from d-f Orbital Interactions

Branson Maynard<sup>a</sup>, Richard Sykora<sup>b</sup>, Joel T. Mague,<sup>c</sup> and Anne E. V. Gorden<sup>a\*</sup>

<sup>a</sup>Department of Chemistry and Biochemistry, Auburn University, AL, USA 36849

<sup>b</sup>Department of Chemistry, University of South Alabama, AL, USA 36688

<sup>c</sup>Department of Chemistry, Tulane University, LA, USA 70118

Email: gordeae@auburn.edu

## Table of Contents

|                                                                                                                                                       |    |
|-------------------------------------------------------------------------------------------------------------------------------------------------------|----|
| General Experimental                                                                                                                                  | 1  |
| Crystallographic Images                                                                                                                               | 2  |
| MALDI - mass spectrometry data                                                                                                                        | 5  |
| FTIR                                                                                                                                                  | 8  |
| Crystallographic Information                                                                                                                          | 10 |
| <b>1</b> Th <sub>2</sub> (H <sub>2</sub> O) <sub>10</sub> (OH)[Pt(CN) <sub>4</sub> ] <sub>2</sub> ·5H <sub>2</sub> O                                  | 10 |
| <b>2</b> Th(H <sub>2</sub> O) <sub>7</sub> [Pt(CN) <sub>4</sub> ] <sub>2</sub> ·10H <sub>2</sub> O                                                    | 17 |
| <b>3</b> K <sub>3</sub> [(UO <sub>2</sub> ) <sub>2</sub> (OH)(Pt(CN) <sub>4</sub> ) <sub>2</sub> ] <sub>2</sub> ·NO <sub>3</sub> ·1.5H <sub>2</sub> O | 24 |

## Experimental Section

**General Procedure:** UO<sub>2</sub>(NO<sub>3</sub>)<sub>2</sub>·6H<sub>2</sub>O, Th(NO<sub>3</sub>)<sub>4</sub>·6H<sub>2</sub>O and K<sub>2</sub>[Pt(CN)<sub>4</sub>]·3H<sub>2</sub>O were purchased from Acros and used as received. The IR data were recorded as KBr pellets on SHIMADZU Inc. IR, Prestige-21 Fourier Transform Infrared Spectrophotometer in the range 400 – 4000 cm<sup>-1</sup>. MALDI was performed on a Micromass QTOF mass spectrometer.

**Synthesis:** Th(H<sub>2</sub>O)<sub>7</sub>[Pt(CN)<sub>4</sub>]<sub>2</sub>·10H<sub>2</sub>O (**1**) was prepared by dissolving 0.0250 g (0.04 mmol) of Th(NO<sub>3</sub>)<sub>4</sub>·6H<sub>2</sub>O and 0.0235 g (0.06 mmol) of K<sub>2</sub>[Pt(CN)<sub>4</sub>]·xH<sub>2</sub>O in 3 mL of H<sub>2</sub>O in a test tube. The pH was brought to 2.5 with a small amount of 0.01 M KOH. The test tube was placed in a slow evaporation chamber, after 29 days green-yellow plates suitable for single crystal X-ray diffraction were observed.

$\text{Th}_2(\text{H}_2\text{O})_{10}(\text{OH})[\text{Pt}(\text{CN})_4]_2 \cdot 5\text{H}_2\text{O}$  (**2**) was prepared out by dissolving 0.0246 g (0.04 mmol) of  $\text{Th}(\text{NO}_3)_4 \cdot 6\text{H}_2\text{O}$  and 0.0237 g (.06 mmol) of  $\text{K}_2[\text{Pt}(\text{CN})_4] \cdot 3\text{H}_2\text{O}$  in 3 mL of  $\text{H}_2\text{O}$  in a test tube. The test tube was placed in a slow evaporation chamber, after 14 days green-yellow plates suitable for single crystal X-ray diffraction were observed.

$\text{K}_3[(\text{UO}_2)_2(\text{OH})(\text{Pt}(\text{CN})_4)_2]_2 \cdot \text{NO}_3 \cdot 1.5\text{H}_2\text{O}$  (**3**) was prepared dissolving 0.0248 g (0.05 mmol) of  $\text{UO}_2(\text{NO}_3)_2 \cdot 6\text{H}_2\text{O}$  and 0.0190 g (.05 mmol) of  $\text{K}_2[\text{Pt}(\text{CN})_4] \cdot x\text{H}_2\text{O}$  in 3 mL of  $\text{H}_2\text{O}$ . The test tube was placed in a slow evaporation chamber, after 20 days yellow plates suitable for single crystal X-ray diffraction were observed.

**X-ray Crystallography:** Crystals of compounds **2** and **3** were obtained in good yield from slow evaporation in water at room temperature. Crystals of **1** were obtained by slow evaporation of a water solution with a pH of 2.5. X-ray diffraction data for **1** were collected at  $-80^\circ\text{C}$  on a Bruker SMART APEX CCD X-ray diffractometer unit using Mo  $\text{K}\alpha$  radiation from crystals mounted in Paratone-N oil on glass fibers. SMART (v 5.624) was used for preliminary determination of cell constants and data collection control. Determination of integrated intensities and global cell refinement were performed with the Bruker SAINT Software package using a narrow-frame integration algorithm. X-ray data for **2** and **3** were collected using a Varian Oxford Xcalibur E single-crystal X-ray diffractometer. Intensity measurements were performed using Mo  $\text{K}\alpha$  radiation, from a sealed-tube Enhance X-ray source, and an Eos area detector. CrysAlis<sup>R1</sup> was used for preliminary determination of the cell constants, data collection strategy, and for data collection control. Following data collection, CrysAlis was also used to integrate the reflection intensities, apply an absorption correction to the data, and perform a global cell refinement. The program suite SHELXTL (v 5.1) was used for space group determination, structure solution, and refinement.<sup>1</sup> Refinement was performed against  $F^2$  by weighted full-matrix least square, and empirical absorption correction (SADABS<sup>3</sup>) was applied. H atoms were found from the difference fourier maps.

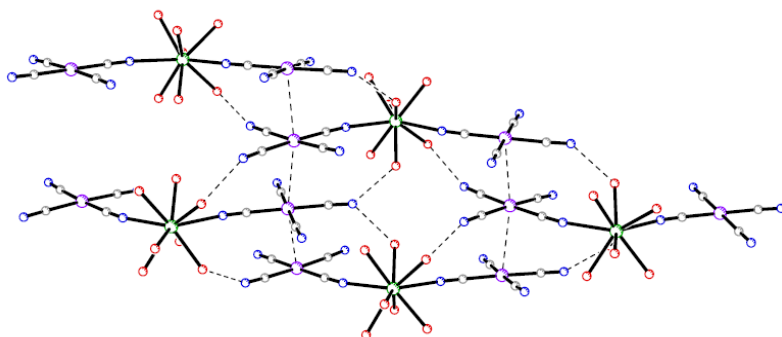

**Fig. S1** Packing diagram of **1**,  $\text{Th}(\text{H}_2\text{O})_7[\text{Pt}(\text{CN})_4]_2 \cdot 10\text{H}_2\text{O}$ . Pt-Pt interactions and hydrogen bonding shown with dotted lines.

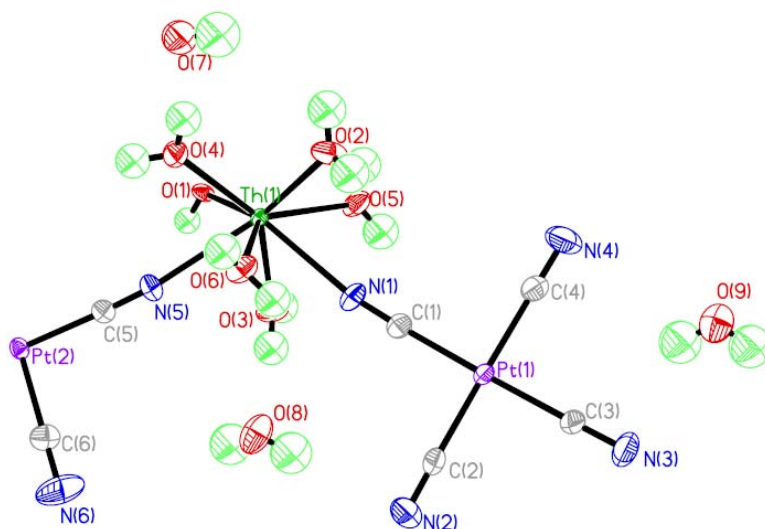

Fig. S2 Asymmetric unit of  $\text{Th}_2(\text{H}_2\text{O})_{10}(\text{OH})_2[\text{Pt}(\text{CN})_4]_3 \cdot 5\text{H}_2\text{O}$  (**2**).

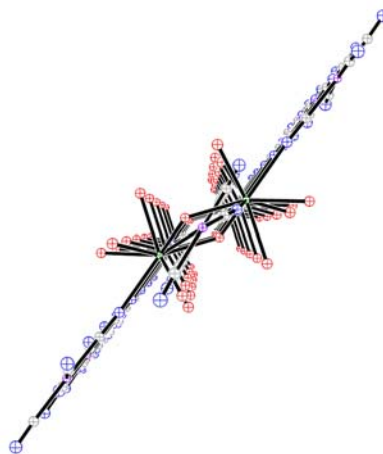

Fig. S3 Viewing down the C axis **2**. Two Th centers are bridged by a hydroxy group.

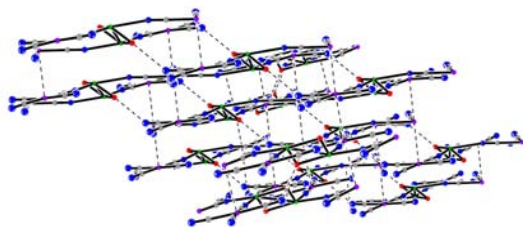

Fig. S4 Packing diagram of **2** Pt-Pt interactions and hydrogen bonding shown with dotted lines.

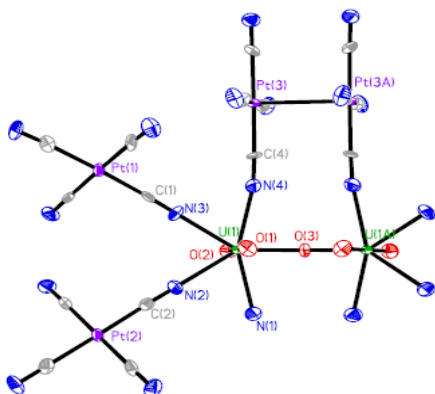

Fig. S5 Diagram showing dimeric Pt-Pt interactions (SHELX, 50% thermal ellipsoids) of  $\text{K}_3[(\text{UO}_2)_2(\text{OH})(\text{Pt}(\text{CN})_4)_2]\cdot\text{NO}_3\cdot 1.5\text{H}_2\text{O}$  (**3**).

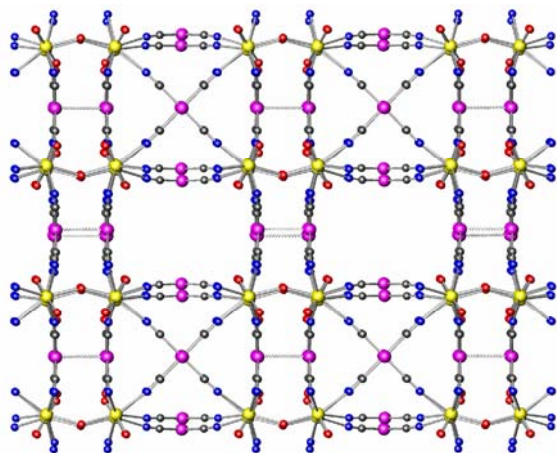

Fig. S6 Packing diagram of  $\text{K}_3[(\text{UO}_2)_2(\text{OH})(\text{Pt}(\text{CN})_4)_2]\cdot\text{NO}_3\cdot 1.5\text{H}_2\text{O}$  (**3**) viewed perpendicular to the c axis.

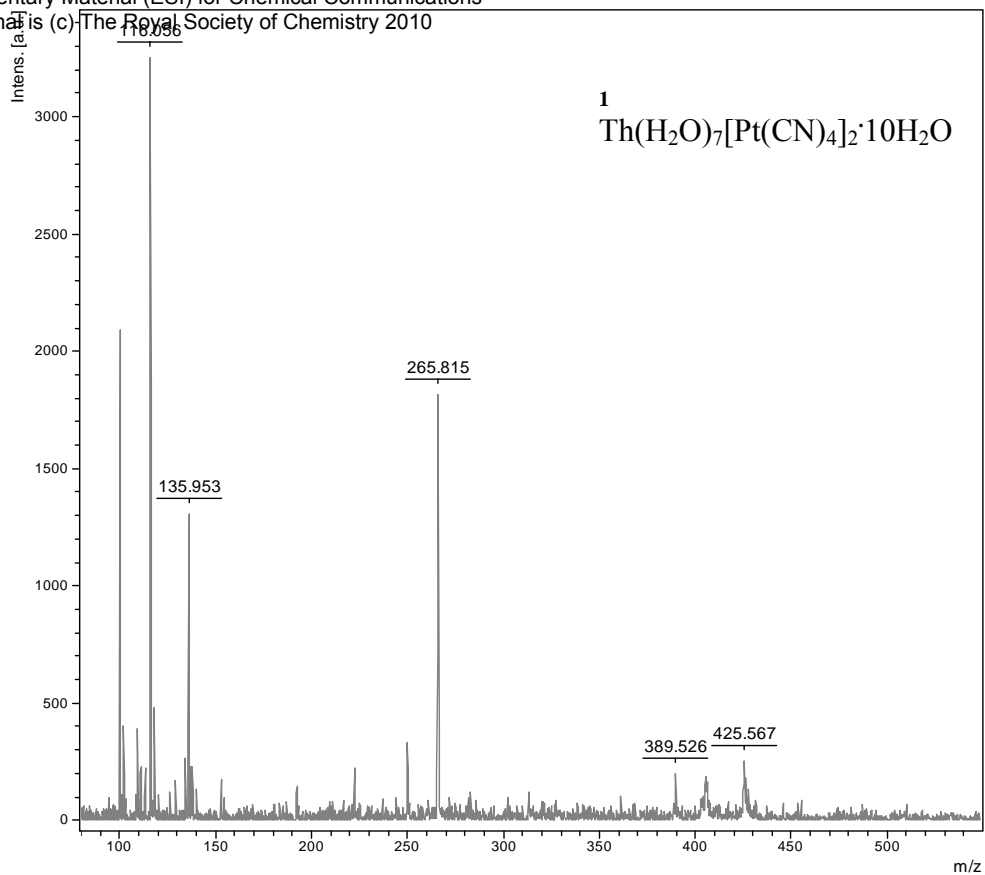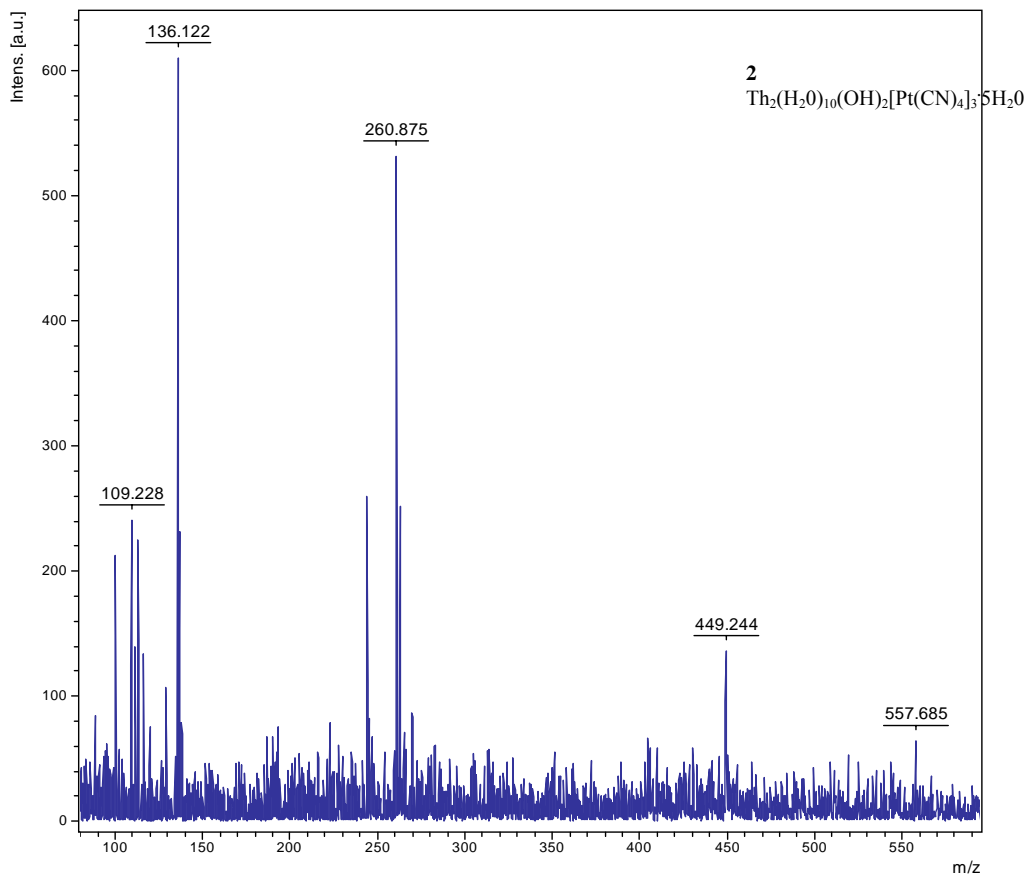

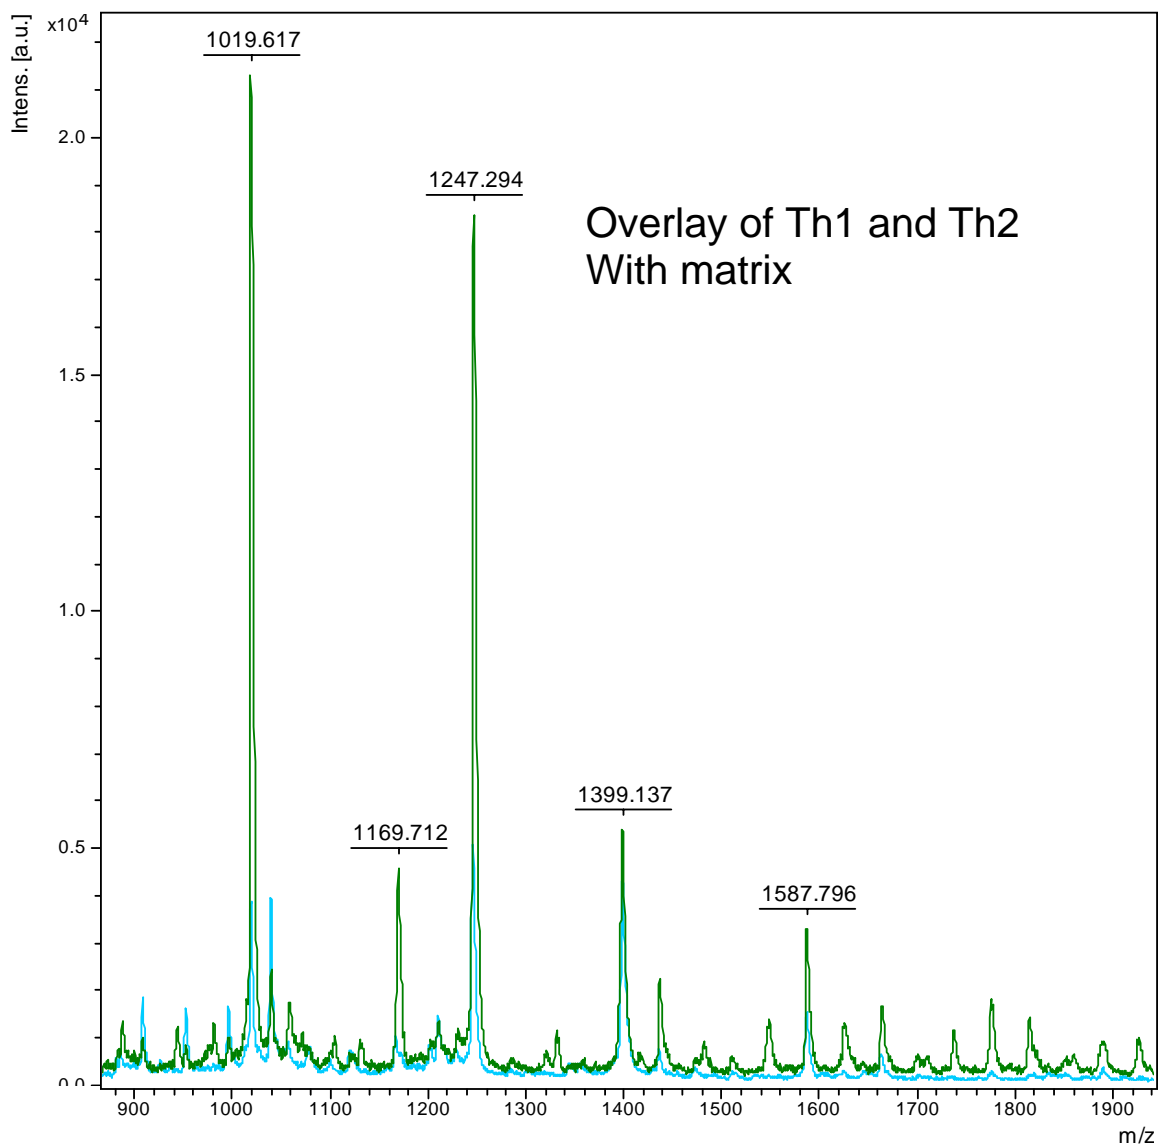

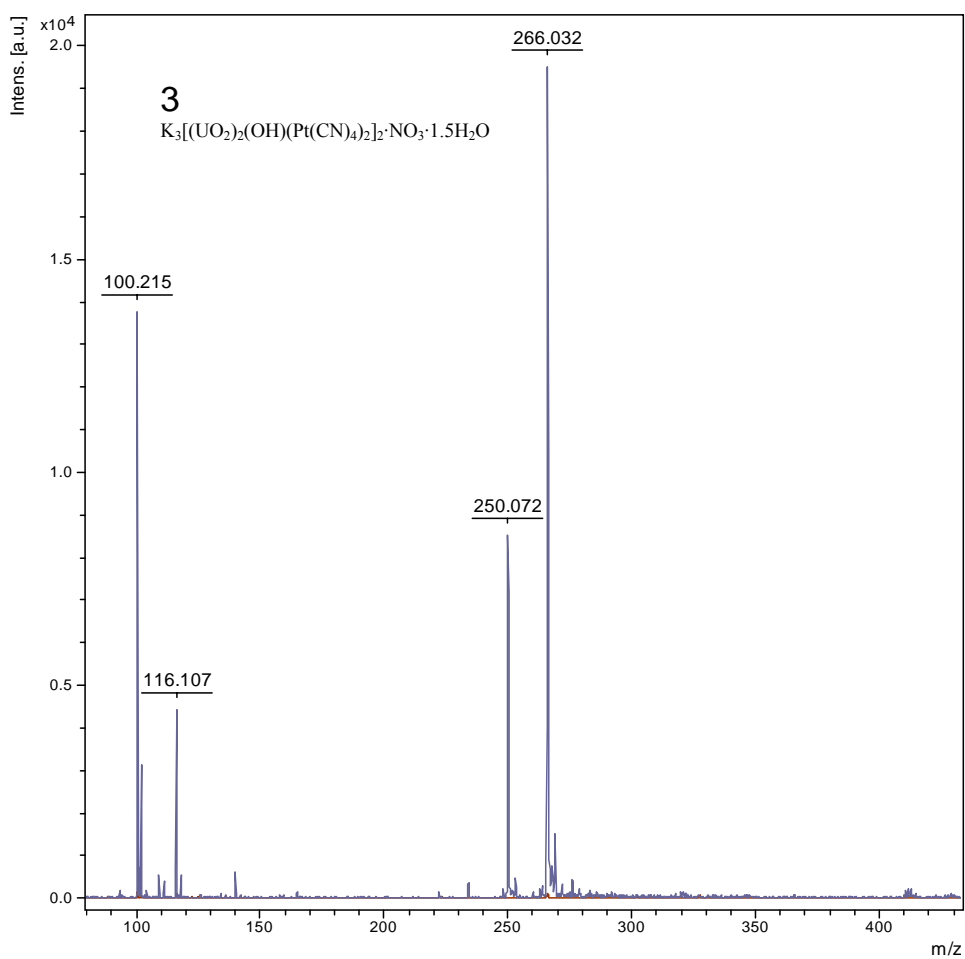

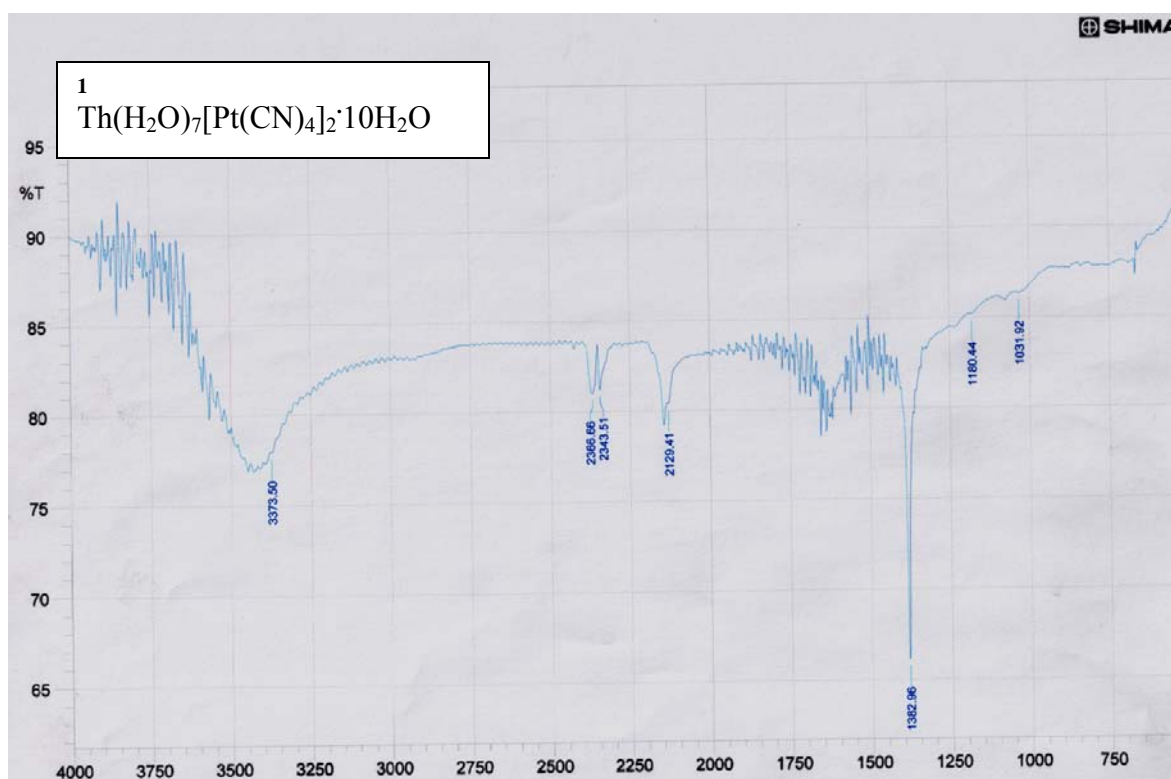



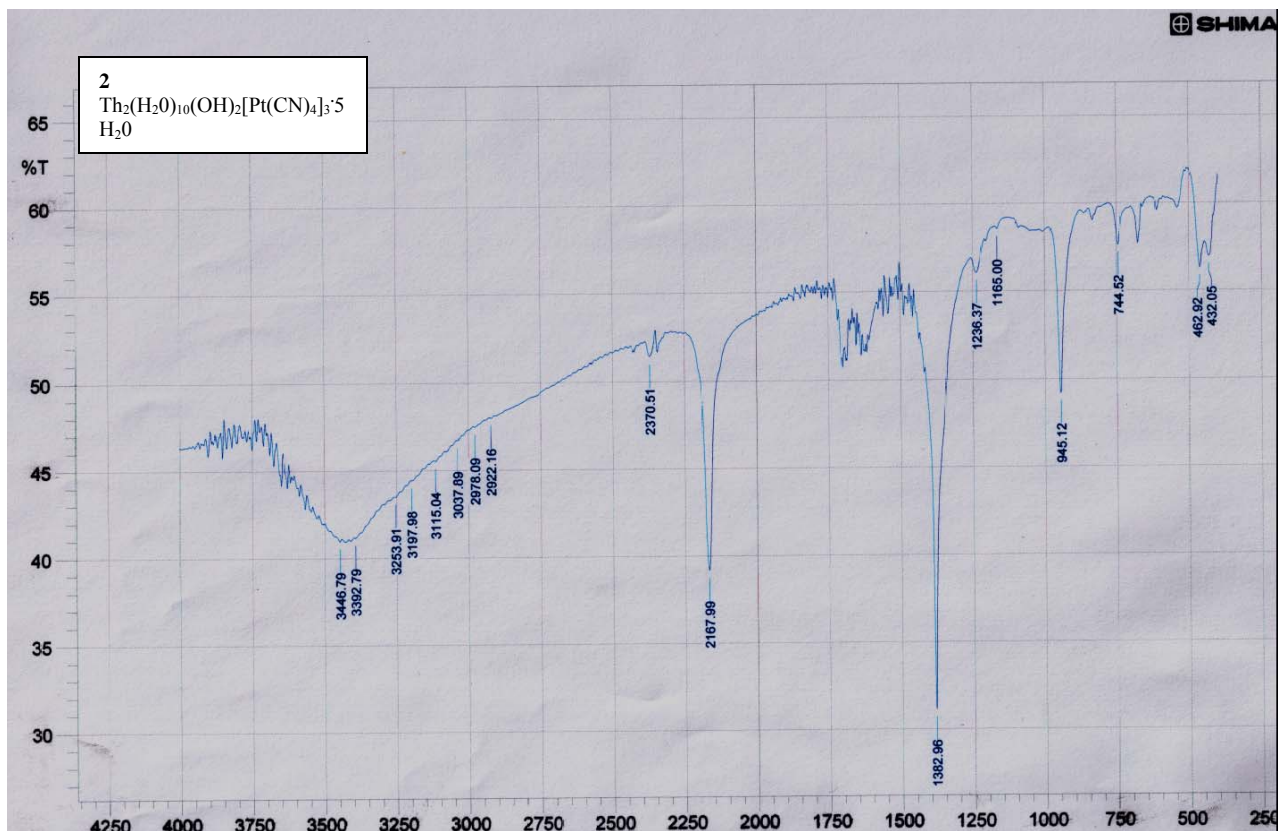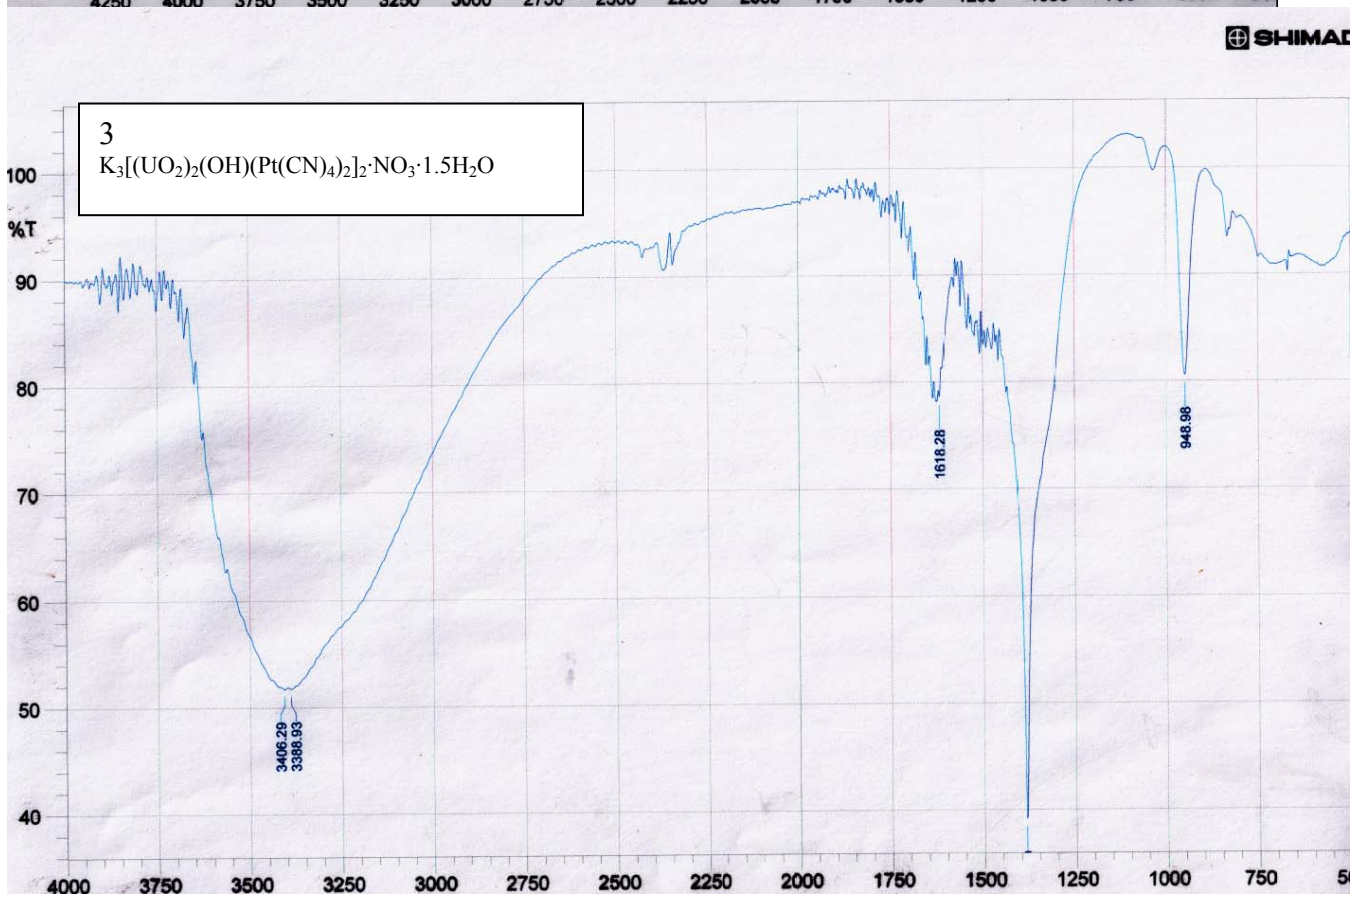

## Crystallographic Information for **1,2** and **3**

Table 1. Crystal data and structure refinement for **1**, Th(H<sub>2</sub>O)<sub>7</sub>[Pt(CN)<sub>4</sub>]<sub>2</sub>·10H<sub>2</sub>O.

|                                   |                                             |
|-----------------------------------|---------------------------------------------|
| Identification code               | Th1                                         |
| Empirical formula                 | C8 H34 N8 O17 Pt2 Th                        |
| Formula weight                    | 1136.65                                     |
| Temperature                       | 193(2) K                                    |
| Wavelength                        | 0.71073 Å                                   |
| Crystal system, space group       | Orthorhombic, Pbca                          |
| Unit cell dimensions              |                                             |
|                                   | a = 13.2464(6) Å alpha = 90.0000(9) °       |
|                                   | b = 20.5599(10) Å beta = 90.0000(1) °       |
|                                   | c = 22.4536(11) Å gamma = 90.0000(9) °      |
| Volume                            | 6115.1(5) Å <sup>3</sup>                    |
| Z, Calculated density             | 8, 2.469 Mg/m <sup>3</sup>                  |
| Absorption coefficient            | 14.053 mm <sup>-1</sup>                     |
| F(000)                            | 4160                                        |
| Crystal size                      | 0.80 x 0.80 x 0.09 mm                       |
| Theta range for data collection   | 1.81 to 28.27 °                             |
| Limiting indices                  | -17<=h<=17, -27<=k<=27, -29<=l<=29          |
| Reflections collected / unique    | 59819 / 7574 [R(int) = 0.0737]              |
| Completeness to theta = 28.27     | 99.9 %                                      |
| Absorption correction             | Analytical                                  |
| Max. and min. transmission        | 0.3710 and 0.0314                           |
| Refinement method                 | Full-matrix least-squares on F <sup>2</sup> |
| Data / restraints / parameters    | 7574 / 0 / 313                              |
| Goodness-of-fit on F <sup>2</sup> | 0.999                                       |
| Final R indices [I>2sigma(I)]     | R1 = 0.0301, wR2 = 0.0766                   |
| R indices (all data)              | R1 = 0.0373, wR2 = 0.0781                   |
| Largest diff. peak and hole       | 2.154 and -3.034 e. Å <sup>-3</sup>         |

Table 2. Atomic coordinates (x 10<sup>4</sup>) and equivalent isotropic displacement parameters (Å<sup>2</sup>x 10<sup>3</sup>)

$\text{Th}(\text{H}_2\text{O})_7[\text{Pt}(\text{CN})_4]_2 \cdot 10\text{H}_2\text{O}$ .  $U(\text{eq})$  is defined as one third of the trace of the orthogonalized  $U^{ij}$  tensor.

|       | x       | y       | z        | $U(\text{eq})$ |
|-------|---------|---------|----------|----------------|
| Th(1) | 3617(1) | 3956(1) | 8669(1)  | 14(1)          |
| Pt(1) | 3747(1) | 6259(1) | 7345(1)  | 16(1)          |
| O(1)  | 2519(3) | 3947(2) | 7783(2)  | 28(1)          |
| N(1)  | 3683(3) | 5121(2) | 8278(2)  | 22(1)          |
| C(1)  | 3711(4) | 5557(2) | 7954(2)  | 18(1)          |
| O(2)  | 4947(3) | 3941(2) | 7922(2)  | 25(1)          |
| Pt(2) | 3733(1) | 1421(1) | 7668(1)  | 15(1)          |
| N(2)  | 1312(3) | 2367(3) | 8310(3)  | 33(1)          |
| C(2)  | 3733(4) | 6956(3) | 7957(3)  | 21(1)          |
| O(3)  | 2275(3) | 3225(2) | 9036(2)  | 23(1)          |
| N(3)  | 6121(4) | 2301(2) | 8688(2)  | 31(1)          |
| C(3)  | 3809(4) | 6923(3) | 6703(3)  | 24(1)          |
| O(4)  | 2058(3) | 4602(2) | 8865(2)  | 25(1)          |
| N(4)  | 3619(4) | 5162(3) | 6382(2)  | 35(1)          |
| C(4)  | 3683(4) | 5561(3) | 6732(3)  | 26(1)          |
| O(5)  | 5104(3) | 4559(2) | 9052(2)  | 25(1)          |
| N(5)  | 3705(3) | 2874(2) | 8098(2)  | 18(1)          |
| C(5)  | 3725(4) | 2356(3) | 7925(2)  | 18(1)          |
| O(6)  | 4743(3) | 3181(2) | 9197(2)  | 24(1)          |
| N(6)  | 3954(4) | 1798(3) | 6321(2)  | 33(1)          |
| C(6)  | 3872(4) | 1663(3) | 6813(3)  | 22(1)          |
| O(7)  | 3459(3) | 4136(2) | 9730(2)  | 27(1)          |
| C(7)  | 3567(4) | 1168(3) | 8520(3)  | 20(1)          |
| N(7)  | 3449(4) | 1006(2) | 9002(2)  | 31(1)          |
| O(8)  | 127(3)  | 4252(2) | 8998(2)  | 32(1)          |
| N(8)  | 6239(3) | 4929(3) | 7635(2)  | 28(1)          |
| C(8)  | 3755(4) | 487(3)  | 7462(2)  | 21(1)          |
| O(9)  | 4100(4) | 2602(2) | 10200(2) | 36(1)          |
| O(10) | 4764(3) | 3339(2) | 6865(2)  | 30(1)          |
| O(11) | 4819(3) | 1362(2) | 9962(2)  | 38(1)          |
| O(12) | 6790(3) | 3788(2) | 177(2)   | 35(1)          |
| O(13) | 2101(3) | 4223(2) | 5978(2)  | 32(1)          |

|       |         |         |          |       |
|-------|---------|---------|----------|-------|
| O(14) | 5082(3) | 5813(2) | 9419(2)  | 28(1) |
| O(15) | 2691(3) | 3258(2) | 6760(2)  | 30(1) |
| O(16) | 2020(4) | 2537(2) | 10071(2) | 38(1) |
| O(17) | 1751(4) | 4061(3) | 10301(3) | 74(2) |

---

Table 3. Bond lengths [ $\text{\AA}$ ] and angles [ $^\circ$ ] for  $\text{Th}(\text{H}_2\text{O})_7[\text{Pt}(\text{CN})_4]_2 \cdot 10\text{H}_2\text{O}$ .

---

|             |          |
|-------------|----------|
| Th(1)-O(7)  | 2.420(4) |
| Th(1)-O(2)  | 2.434(4) |
| Th(1)-O(1)  | 2.464(4) |
| Th(1)-O(3)  | 2.469(4) |
| Th(1)-O(5)  | 2.481(4) |
| Th(1)-O(6)  | 2.485(4) |
| Th(1)-O(4)  | 2.494(4) |
| Th(1)-N(1)  | 2.552(5) |
| Th(1)-N(5)  | 2.570(4) |
| Pt(1)-C(2)  | 1.985(6) |
| Pt(1)-C(3)  | 1.986(6) |
| Pt(1)-C(1)  | 1.990(6) |
| Pt(1)-C(4)  | 1.991(6) |
| N(1)-C(1)   | 1.155(7) |
| Pt(2)-C(8)  | 1.975(6) |
| Pt(2)-C(6)  | 1.991(6) |
| Pt(2)-C(7)  | 1.995(6) |
| Pt(2)-C(5)  | 2.007(6) |
| N(2)-C(2)#1 | 1.160(8) |
| C(2)-N(2)#2 | 1.160(8) |
| N(3)-C(3)#3 | 1.176(8) |
| C(3)-N(3)#4 | 1.176(8) |
| N(4)-C(4)   | 1.139(8) |
| N(5)-C(5)   | 1.135(7) |
| N(6)-C(6)   | 1.146(7) |
| C(7)-N(7)   | 1.142(8) |
| N(8)-C(8)#4 | 1.168(8) |
| C(8)-N(8)#3 | 1.168(8) |

|                 |            |
|-----------------|------------|
| O(7)-Th(1)-O(2) | 138.02(13) |
| O(7)-Th(1)-O(1) | 138.15(13) |
| O(2)-Th(1)-O(1) | 82.58(15)  |
| O(7)-Th(1)-O(3) | 72.68(13)  |
| O(2)-Th(1)-O(3) | 138.01(13) |
| O(1)-Th(1)-O(3) | 80.77(13)  |
| O(7)-Th(1)-O(5) | 69.61(14)  |
| O(2)-Th(1)-O(5) | 70.74(14)  |
| O(1)-Th(1)-O(5) | 138.78(14) |
| O(3)-Th(1)-O(5) | 139.48(14) |
| O(7)-Th(1)-O(6) | 71.35(13)  |
| O(2)-Th(1)-O(6) | 83.43(13)  |
| O(1)-Th(1)-O(6) | 137.26(12) |
| O(3)-Th(1)-O(6) | 83.24(13)  |
| O(5)-Th(1)-O(6) | 71.25(13)  |
| O(7)-Th(1)-O(4) | 70.93(13)  |
| O(2)-Th(1)-O(4) | 136.75(13) |
| O(1)-Th(1)-O(4) | 70.01(13)  |
| O(3)-Th(1)-O(4) | 70.69(12)  |
| O(5)-Th(1)-O(4) | 109.29(13) |
| O(6)-Th(1)-O(4) | 138.98(13) |
| O(7)-Th(1)-N(1) | 101.46(15) |
| O(2)-Th(1)-N(1) | 75.52(14)  |
| O(1)-Th(1)-N(1) | 75.52(14)  |
| O(3)-Th(1)-N(1) | 135.31(13) |
| O(5)-Th(1)-N(1) | 67.86(14)  |
| O(6)-Th(1)-N(1) | 138.21(13) |
| O(4)-Th(1)-N(1) | 65.79(13)  |
| O(7)-Th(1)-N(5) | 128.82(15) |
| O(2)-Th(1)-N(5) | 67.17(13)  |
| O(1)-Th(1)-N(5) | 67.51(13)  |
| O(3)-Th(1)-N(5) | 70.85(13)  |
| O(5)-Th(1)-N(5) | 124.67(13) |
| O(6)-Th(1)-N(5) | 69.82(13)  |
| O(4)-Th(1)-N(5) | 125.91(13) |
| N(1)-Th(1)-N(5) | 129.71(15) |

|                   |          |
|-------------------|----------|
| C(2)-Pt(1)-C(3)   | 90.4(2)  |
| C(2)-Pt(1)-C(1)   | 92.6(2)  |
| C(3)-Pt(1)-C(1)   | 176.8(2) |
| C(2)-Pt(1)-C(4)   | 177.0(2) |
| C(3)-Pt(1)-C(4)   | 89.8(2)  |
| C(1)-Pt(1)-C(4)   | 87.2(2)  |
| C(1)-N(1)-Th(1)   | 161.2(4) |
| N(1)-C(1)-Pt(1)   | 175.5(5) |
| C(8)-Pt(2)-C(6)   | 90.9(2)  |
| C(8)-Pt(2)-C(7)   | 88.5(2)  |
| C(6)-Pt(2)-C(7)   | 178.8(2) |
| C(8)-Pt(2)-C(5)   | 176.8(2) |
| C(6)-Pt(2)-C(5)   | 92.2(2)  |
| C(7)-Pt(2)-C(5)   | 88.5(2)  |
| N(2)#2-C(2)-Pt(1) | 177.5(5) |
| N(3)#4-C(3)-Pt(1) | 177.1(5) |
| N(4)-C(4)-Pt(1)   | 178.1(5) |
| C(5)-N(5)-Th(1)   | 170.1(4) |
| N(5)-C(5)-Pt(2)   | 176.4(5) |
| N(6)-C(6)-Pt(2)   | 179.5(6) |
| N(7)-C(7)-Pt(2)   | 177.6(5) |
| N(8)#3-C(8)-Pt(2) | 177.1(5) |

---

Symmetry transformations used to generate equivalent atoms:

#1  $-x+1/2, y-1/2, z$  #2  $-x+1/2, y+1/2, z$  #3  $-x+1, y-1/2, -z+3/2$

#4  $-x+1, y+1/2, -z+3/2$

Table 4. Anisotropic displacement parameters ( $\text{\AA}^2 \times 10^3$ ) for  $\text{Th}(\text{H}_2\text{O})_7[\text{Pt}(\text{CN})_4]_2 \cdot 10\text{H}_2\text{O}$ . The anisotropic displacement factor exponent takes the form:  $-2\pi^2 [h^2 a^{*2} U^{11} + \dots + 2 h k a^* b^* U^{12}]$

|       | $U^{11}$ | $U^{22}$ | $U^{33}$ | $U^{23}$ | $U^{13}$ | $U^{12}$ |
|-------|----------|----------|----------|----------|----------|----------|
| Th(1) | 18(1)    | 14(1)    | 10(1)    | 0(1)     | 0(1)     | 0(1)     |
| Pt(1) | 19(1)    | 16(1)    | 14(1)    | 2(1)     | 1(1)     | 0(1)     |
| O(1)  | 38(2)    | 26(2)    | 19(2)    | -3(2)    | -8(2)    | 6(2)     |
| N(1)  | 27(3)    | 18(2)    | 20(3)    | 2(2)     | -2(2)    | -1(2)    |
| C(1)  | 24(3)    | 16(3)    | 14(3)    | -4(2)    | 0(2)     | 0(2)     |
| O(2)  | 36(2)    | 24(2)    | 16(2)    | -2(2)    | 10(2)    | -3(2)    |
| Pt(2) | 19(1)    | 15(1)    | 13(1)    | -2(1)    | 1(1)     | 0(1)     |
| N(2)  | 31(3)    | 30(3)    | 38(3)    | -8(3)    | 3(2)     | -1(2)    |
| C(2)  | 21(3)    | 19(3)    | 23(3)    | -1(2)    | 0(2)     | -1(2)    |
| O(3)  | 24(2)    | 24(2)    | 19(2)    | -1(2)    | 3(2)     | -6(2)    |
| N(3)  | 35(3)    | 30(3)    | 29(3)    | -9(2)    | 3(2)     | 0(2)     |
| C(3)  | 25(3)    | 21(3)    | 25(3)    | -1(2)    | 0(2)     | 0(2)     |
| O(4)  | 23(2)    | 24(2)    | 27(2)    | 2(2)     | 5(2)     | 5(2)     |
| N(4)  | 47(3)    | 36(3)    | 21(3)    | -7(2)    | -4(2)    | 0(2)     |
| C(4)  | 35(3)    | 26(3)    | 16(3)    | 9(2)     | 0(2)     | -1(2)    |
| O(5)  | 26(2)    | 27(2)    | 23(2)    | -3(2)    | -6(2)    | -3(2)    |
| N(5)  | 26(2)    | 15(2)    | 13(2)    | -2(2)    | 2(2)     | -1(2)    |
| C(5)  | 16(3)    | 25(3)    | 13(3)    | 4(2)     | 1(2)     | 0(2)     |
| O(6)  | 31(2)    | 24(2)    | 16(2)    | 1(2)     | -1(2)    | 6(2)     |
| N(6)  | 40(3)    | 39(3)    | 21(3)    | 0(2)     | 3(3)     | -4(2)    |
| C(6)  | 24(3)    | 23(3)    | 18(3)    | -6(2)    | 0(2)     | 0(2)     |
| O(7)  | 26(2)    | 42(2)    | 12(2)    | -3(2)    | 2(2)     | -1(2)    |
| C(7)  | 22(3)    | 18(3)    | 19(3)    | -4(2)    | 1(2)     | -3(2)    |
| N(7)  | 43(3)    | 27(3)    | 24(3)    | 2(2)     | 3(2)     | -6(2)    |
| O(8)  | 31(2)    | 31(2)    | 35(3)    | -2(2)    | -1(2)    | -1(2)    |
| N(8)  | 32(3)    | 20(3)    | 32(3)    | 4(2)     | 5(2)     | -1(2)    |
| C(8)  | 28(3)    | 23(3)    | 11(3)    | -3(2)    | 4(2)     | 0(2)     |
| O(9)  | 56(3)    | 35(2)    | 16(2)    | 1(2)     | 4(2)     | -1(2)    |
| O(10) | 37(2)    | 32(2)    | 21(2)    | -2(2)    | 0(2)     | 1(2)     |
| O(11) | 45(3)    | 41(3)    | 28(3)    | -1(2)    | -6(2)    | 4(2)     |
| O(12) | 36(2)    | 40(3)    | 28(3)    | 1(2)     | 0(2)     | 4(2)     |

|       |       |        |       |        |       |        |
|-------|-------|--------|-------|--------|-------|--------|
| O(13) | 30(2) | 36(2)  | 29(3) | -3(2)  | -4(2) | -2(2)  |
| O(14) | 37(2) | 29(2)  | 18(2) | -6(2)  | -4(2) | -3(2)  |
| O(15) | 39(2) | 30(2)  | 21(2) | -2(2)  | -3(2) | -1(2)  |
| O(16) | 58(3) | 36(2)  | 20(2) | 7(2)   | 6(2)  | -1(2)  |
| O(17) | 44(3) | 139(6) | 40(3) | -45(4) | 17(3) | -24(3) |

---

Table 5. Crystal data and structure refinement for (2), Th<sub>2</sub>(H<sub>2</sub>O)<sub>10</sub>(OH)<sub>2</sub>[Pt(CN)<sub>4</sub>]<sub>3</sub>·5H<sub>2</sub>O.

|                                   |                                                                                                 |                  |
|-----------------------------------|-------------------------------------------------------------------------------------------------|------------------|
| Identification code               | Th2                                                                                             |                  |
| Empirical formula                 | C <sub>12</sub> H <sub>32</sub> N <sub>12</sub> O <sub>17</sub> Pt <sub>3</sub> Th <sub>2</sub> |                  |
| Formula weight                    | 1665.85                                                                                         |                  |
| Temperature                       | 295(2) K                                                                                        |                  |
| Wavelength                        | 0.71073 Å                                                                                       |                  |
| Crystal system                    | Monoclinic                                                                                      |                  |
| Space group                       | C2/c                                                                                            |                  |
| Unit cell dimensions              | a = 16.4915(4) Å                                                                                | α = 90°.         |
|                                   | b = 12.1941(4) Å                                                                                | β = 114.016(4)°. |
|                                   | c = 19.5380(5) Å                                                                                | γ = 90°.         |
| Volume                            | 3588.9(2) Å <sup>3</sup>                                                                        |                  |
| Z                                 | 4                                                                                               |                  |
| Density (calculated)              | 3.083 Mg/m <sup>3</sup>                                                                         |                  |
| Absorption coefficient            | 19.989 mm <sup>-1</sup>                                                                         |                  |
| F(000)                            | 2952                                                                                            |                  |
| Crystal size                      | 0.29 x 0.03 x 0.03 mm <sup>3</sup>                                                              |                  |
| Theta range for data collection   | 3.34 to 30.61°.                                                                                 |                  |
| Index ranges                      | -22 ≤ h ≤ 23, -16 ≤ k ≤ 17, -27 ≤ l ≤ 27                                                        |                  |
| Reflections collected             | 32269                                                                                           |                  |
| Independent reflections           | 5166 [R(int) = 0.0281]                                                                          |                  |
| Completeness to theta = 29.00°    | 99.6 %                                                                                          |                  |
| Absorption correction             | Semi-empirical from equivalents                                                                 |                  |
| Max. and min. transmission        | 1.0 and 0.30                                                                                    |                  |
| Refinement method                 | Full-matrix least-squares on F <sup>2</sup>                                                     |                  |
| Data / restraints / parameters    | 5166 / 0 / 211                                                                                  |                  |
| Goodness-of-fit on F <sup>2</sup> | 0.918                                                                                           |                  |



|                                      |                                       |
|--------------------------------------|---------------------------------------|
| Final R indices [ $I > 2\sigma(I)$ ] | R1 = 0.0141, wR2 = 0.0239             |
| R indices (all data)                 | R1 = 0.0211, wR2 = 0.0244             |
| Extinction coefficient               | 0.000167(4)                           |
| Largest diff. peak and hole          | 0.652 and -0.703 e. $\text{\AA}^{-3}$ |

Table 6. Atomic coordinates ( $\times 10^4$ ) and equivalent isotropic displacement parameters ( $\text{\AA}^2 \times 10^3$ ) for  $\text{Th}_2(\text{H}_2\text{O})_{10}(\text{OH})_2[\text{Pt}(\text{CN})_4]_3 \cdot 5\text{H}_2\text{O}$ .  $U(\text{eq})$  is defined as one third of the trace of the orthogonalized  $U^{ij}$  tensor.

|       | x        | y        | z        | U(eq) |
|-------|----------|----------|----------|-------|
| Th(1) | 1439(1)  | 1950(1)  | 149(1)   | 15(1) |
| Pt(1) | -838(1)  | 2711(1)  | 1667(1)  | 19(1) |
| Pt(2) | 2500     | -2500    | 0        | 19(1) |
| O(1)  | 2912(1)  | 1674(1)  | 321(1)   | 21(1) |
| O(2)  | 327(1)   | 3347(2)  | -470(1)  | 39(1) |
| O(3)  | 2138(1)  | 1128(2)  | 1407(1)  | 36(1) |
| O(4)  | 978(1)   | 1541(2)  | -1193(1) | 32(1) |
| O(5)  | 1993(2)  | 3462(2)  | 1087(1)  | 41(1) |
| O(6)  | -40(1)   | 1005(2)  | -412(1)  | 31(1) |
| O(7)  | 0        | 2667(3)  | -2500    | 48(1) |
| O(8)  | 1252(2)  | -571(2)  | 1772(1)  | 52(1) |
| O(9)  | -1371(2) | 6087(2)  | 2690(1)  | 51(1) |
| C(1)  | -39(2)   | 2306(2)  | 1173(2)  | 25(1) |
| C(2)  | -1040(2) | 1152(2)  | 1838(2)  | 30(1) |
| C(3)  | -1609(2) | 3159(2)  | 2176(2)  | 28(1) |
| C(4)  | -705(2)  | 4284(2)  | 1463(2)  | 30(1) |
| C(5)  | 1985(2)  | -1034(2) | 46(1)    | 22(1) |
| C(6)  | 1855(2)  | -3191(2) | 550(2)   | 32(1) |
| N(1)  | 429(2)   | 2110(2)  | 888(1)   | 30(1) |
| N(2)  | -1182(2) | 261(2)   | 1927(2)  | 53(1) |
| N(3)  | -2028(2) | 3433(2)  | 2486(2)  | 47(1) |
| N(4)  | -661(2)  | 5176(2)  | 1329(2)  | 49(1) |
| N(5)  | 1694(2)  | -181(2)  | 51(1)    | 27(1) |
| N(6)  | 1490(2)  | -3589(3) | 873(2)   | 63(1) |

Table 7. Bond lengths [Å] and angles [°] for  $\text{Th}_2(\text{H}_2\text{O})_{10}(\text{OH})_2[\text{Pt}(\text{CN})_4]_3 \cdot 5\text{H}_2\text{O}$ .

---

|               |            |
|---------------|------------|
| Th(1)-O(1)    | 2.3369(17) |
| Th(1)-O(1)#1  | 2.3675(17) |
| Th(1)-O(2)    | 2.4342(18) |
| Th(1)-O(3)    | 2.4631(18) |
| Th(1)-O(4)    | 2.4650(18) |
| Th(1)-O(5)    | 2.4962(19) |
| Th(1)-O(6)    | 2.5113(18) |
| Th(1)-N(1)    | 2.619(2)   |
| Th(1)-N(5)    | 2.651(2)   |
| Th(1)-Th(1)#1 | 4.0045(2)  |
| Pt(1)-C(2)    | 1.982(3)   |
| Pt(1)-C(3)    | 1.982(3)   |
| Pt(1)-C(1)    | 1.987(3)   |
| Pt(1)-C(4)    | 1.988(3)   |
| Pt(2)-C(6)#2  | 1.982(3)   |
| Pt(2)-C(6)    | 1.982(3)   |
| Pt(2)-C(5)#2  | 1.997(3)   |
| Pt(2)-C(5)    | 1.997(3)   |
| O(1)-Th(1)#1  | 2.3675(17) |
| O(1)-H(1A)    | 0.8501     |
| O(2)-H(2A)    | 0.8500     |
| O(2)-H(2B)    | 0.8499     |
| O(3)-H(3A)    | 0.8500     |
| O(3)-H(3B)    | 0.8501     |
| O(4)-H(4A)    | 0.8500     |
| O(4)-H(4B)    | 0.8500     |
| O(5)-H(5A)    | 0.8500     |
| O(5)-H(5B)    | 0.8500     |
| O(6)-H(6A)    | 0.8500     |
| O(6)-H(6B)    | 0.8501     |
| O(7)-H(7)     | 0.8501     |
| O(8)-H(8A)    | 0.8499     |
| O(8)-H(8B)    | 0.8500     |

|                   |           |
|-------------------|-----------|
| O(9)-H(9A)        | 0.8500    |
| O(9)-H(9B)        | 0.8500    |
| C(1)-N(1)         | 1.145(3)  |
| C(2)-N(2)         | 1.140(4)  |
| C(3)-N(3)         | 1.139(4)  |
| C(4)-N(4)         | 1.129(4)  |
| C(5)-N(5)         | 1.147(3)  |
| C(6)-N(6)         | 1.141(4)  |
| O(1)-Th(1)-O(1)#1 | 63.31(7)  |
| O(1)-Th(1)-O(2)   | 134.55(6) |
| O(1)#1-Th(1)-O(2) | 71.29(6)  |
| O(1)-Th(1)-O(3)   | 76.19(6)  |
| O(1)#1-Th(1)-O(3) | 125.04(6) |
| O(2)-Th(1)-O(3)   | 137.08(7) |
| O(1)-Th(1)-O(4)   | 88.66(7)  |
| O(1)#1-Th(1)-O(4) | 73.94(6)  |
| O(2)-Th(1)-O(4)   | 76.67(7)  |
| O(3)-Th(1)-O(4)   | 142.68(7) |
| O(1)-Th(1)-O(5)   | 87.31(7)  |
| O(1)#1-Th(1)-O(5) | 70.95(6)  |
| O(2)-Th(1)-O(5)   | 79.88(8)  |
| O(3)-Th(1)-O(5)   | 71.65(7)  |
| O(4)-Th(1)-O(5)   | 142.45(6) |
| O(1)-Th(1)-O(6)   | 139.91(6) |
| O(1)#1-Th(1)-O(6) | 131.91(6) |
| O(2)-Th(1)-O(6)   | 72.66(7)  |
| O(3)-Th(1)-O(6)   | 103.04(6) |
| O(4)-Th(1)-O(6)   | 67.57(6)  |
| O(5)-Th(1)-O(6)   | 131.24(7) |
| O(1)-Th(1)-N(1)   | 142.06(7) |
| O(1)#1-Th(1)-N(1) | 130.56(7) |
| O(2)-Th(1)-N(1)   | 72.63(7)  |
| O(3)-Th(1)-N(1)   | 67.93(7)  |
| O(4)-Th(1)-N(1)   | 127.69(7) |
| O(5)-Th(1)-N(1)   | 70.37(7)  |
| O(6)-Th(1)-N(1)   | 63.37(7)  |

|                      |            |
|----------------------|------------|
| O(1)-Th(1)-N(5)      | 71.54(6)   |
| O(1)#1-Th(1)-N(5)    | 123.85(7)  |
| O(2)-Th(1)-N(5)      | 139.42(7)  |
| O(3)-Th(1)-N(5)      | 69.49(7)   |
| O(4)-Th(1)-N(5)      | 73.40(6)   |
| O(5)-Th(1)-N(5)      | 139.08(7)  |
| O(6)-Th(1)-N(5)      | 70.93(7)   |
| N(1)-Th(1)-N(5)      | 105.55(7)  |
| O(1)-Th(1)-Th(1)#1   | 31.89(4)   |
| O(1)#1-Th(1)-Th(1)#1 | 31.43(4)   |
| O(2)-Th(1)-Th(1)#1   | 102.69(5)  |
| O(3)-Th(1)-Th(1)#1   | 101.54(5)  |
| O(4)-Th(1)-Th(1)#1   | 79.79(5)   |
| O(5)-Th(1)-Th(1)#1   | 77.27(5)   |
| O(6)-Th(1)-Th(1)#1   | 147.28(4)  |
| N(1)-Th(1)-Th(1)#1   | 147.64(5)  |
| N(5)-Th(1)-Th(1)#1   | 98.31(5)   |
| C(2)-Pt(1)-C(3)      | 89.65(11)  |
| C(2)-Pt(1)-C(1)      | 91.90(11)  |
| C(3)-Pt(1)-C(1)      | 178.04(11) |
| C(2)-Pt(1)-C(4)      | 176.96(12) |
| C(3)-Pt(1)-C(4)      | 88.88(12)  |
| C(1)-Pt(1)-C(4)      | 89.63(11)  |
| C(6)#2-Pt(2)-C(6)    | 180.00(19) |
| C(6)#2-Pt(2)-C(5)#2  | 91.37(11)  |
| C(6)-Pt(2)-C(5)#2    | 88.63(11)  |
| C(6)#2-Pt(2)-C(5)    | 88.63(11)  |
| C(6)-Pt(2)-C(5)      | 91.37(11)  |
| C(5)#2-Pt(2)-C(5)    | 180.00(15) |
| Th(1)-O(1)-Th(1)#1   | 116.69(7)  |
| Th(1)-O(1)-H(1A)     | 121.4      |
| Th(1)#1-O(1)-H(1A)   | 121.1      |
| Th(1)-O(2)-H(2A)     | 118.3      |
| Th(1)-O(2)-H(2B)     | 119.7      |
| H(2A)-O(2)-H(2B)     | 120.5      |
| Th(1)-O(3)-H(3A)     | 123.6      |

|                  |          |
|------------------|----------|
| Th(1)-O(3)-H(3B) | 120.5    |
| H(3A)-O(3)-H(3B) | 115.6    |
| Th(1)-O(4)-H(4A) | 124.4    |
| Th(1)-O(4)-H(4B) | 124.7    |
| H(4A)-O(4)-H(4B) | 110.7    |
| Th(1)-O(5)-H(5A) | 109.8    |
| Th(1)-O(5)-H(5B) | 128.6    |
| H(5A)-O(5)-H(5B) | 121.4    |
| Th(1)-O(6)-H(6A) | 129.4    |
| Th(1)-O(6)-H(6B) | 112.5    |
| H(6A)-O(6)-H(6B) | 112.0    |
| H(8A)-O(8)-H(8B) | 104.9    |
| H(9A)-O(9)-H(9B) | 108.9    |
| N(1)-C(1)-Pt(1)  | 177.6(3) |
| N(2)-C(2)-Pt(1)  | 177.9(3) |
| N(3)-C(3)-Pt(1)  | 177.7(3) |
| N(4)-C(4)-Pt(1)  | 177.5(3) |
| N(5)-C(5)-Pt(2)  | 177.6(3) |
| N(6)-C(6)-Pt(2)  | 179.4(3) |
| C(1)-N(1)-Th(1)  | 171.5(2) |
| C(5)-N(5)-Th(1)  | 165.5(2) |

Symmetry transformations used to generate equivalent atoms:

#1 -x+1/2,-y+1/2,-z #2 -x+1/2,-y-1/2,-z

Table 8. Anisotropic displacement parameters ( $\text{\AA}^2 \times 10^3$ ) for  $\text{Th}_2(\text{H}_2\text{O})_{10}(\text{OH})_2[\text{Pt}(\text{CN})_4]_3 \cdot 5\text{H}_2\text{O}$ . The anisotropic displacement factor exponent takes the form:  $-2\pi^2 [ h^2 a^{*2} U^{11} + \dots + 2 h k a^* b^* U^{12} ]$

|       | $U^{11}$ | $U^{22}$ | $U^{33}$ | $U^{23}$ | $U^{13}$ | $U^{12}$ |
|-------|----------|----------|----------|----------|----------|----------|
| Th(1) | 15(1)    | 15(1)    | 18(1)    | 1(1)     | 10(1)    | 1(1)     |
| Pt(1) | 21(1)    | 21(1)    | 19(1)    | 1(1)     | 12(1)    | 2(1)     |
| Pt(2) | 16(1)    | 16(1)    | 24(1)    | 0(1)     | 9(1)     | 2(1)     |
| O(1)  | 19(1)    | 17(1)    | 33(1)    | 9(1)     | 15(1)    | 5(1)     |
| O(2)  | 24(1)    | 38(1)    | 61(1)    | 26(1)    | 24(1)    | 11(1)    |

|      |       |       |       |        |       |        |
|------|-------|-------|-------|--------|-------|--------|
| O(3) | 32(1) | 48(1) | 25(1) | 10(1)  | 8(1)  | -2(1)  |
| O(4) | 44(1) | 29(1) | 23(1) | 0(1)   | 13(1) | 5(1)   |
| O(5) | 61(2) | 39(1) | 34(1) | -15(1) | 32(1) | -23(1) |
| O(6) | 23(1) | 43(1) | 29(1) | -3(1)  | 13(1) | -9(1)  |
| O(7) | 61(2) | 42(2) | 39(2) | 0      | 18(2) | 0      |
| O(8) | 41(1) | 80(2) | 32(1) | -5(1)  | 12(1) | 9(1)   |
| O(9) | 45(2) | 66(2) | 36(1) | -4(1)  | 11(1) | 6(1)   |
| C(1) | 23(1) | 28(2) | 23(1) | -1(1)  | 10(1) | -2(1)  |
| C(2) | 39(2) | 30(2) | 27(2) | -3(1)  | 20(1) | 4(1)   |
| C(3) | 33(2) | 27(2) | 27(1) | 6(1)   | 17(1) | 6(1)   |
| C(4) | 29(2) | 34(2) | 28(2) | 3(1)   | 15(1) | 1(1)   |
| C(5) | 17(1) | 23(1) | 25(1) | -1(1)  | 7(1)  | -2(1)  |
| C(6) | 22(1) | 36(2) | 37(2) | 7(1)   | 13(1) | 4(1)   |
| N(1) | 27(1) | 41(2) | 29(1) | -3(1)  | 18(1) | -1(1)  |
| N(2) | 90(2) | 28(2) | 55(2) | -1(1)  | 42(2) | -2(2)  |
| N(3) | 57(2) | 55(2) | 45(2) | 11(1)  | 36(2) | 23(2)  |
| N(4) | 57(2) | 31(2) | 60(2) | 14(1)  | 25(2) | 0(1)   |
| N(5) | 26(1) | 20(1) | 33(1) | -2(1)  | 11(1) | 2(1)   |
| N(6) | 35(2) | 97(3) | 64(2) | 31(2)  | 28(2) | 6(2)   |

Table 9. Hydrogen coordinates ( $\times 10^4$ ) and isotropic displacement parameters ( $\text{\AA}^2 \times 10^3$ )  
 for  $\text{Th}_2(\text{H}_2\text{O})_{10}(\text{OH})_2[\text{Pt}(\text{CN})_4]_3 \cdot 5\text{H}_2\text{O}$ .

|       | x    | y    | z     | U(eq) |
|-------|------|------|-------|-------|
| H(1A) | 3224 | 1161 | 599   | 32    |
| H(2A) | -179 | 3287 | -455  | 58    |
| H(2B) | 404  | 3789 | -774  | 58    |
| H(3A) | 2634 | 1337 | 1739  | 54    |
| H(3B) | 1864 | 649  | 1548  | 54    |
| H(4A) | 1123 | 964  | -1361 | 48    |
| H(4B) | 686  | 1975 | -1548 | 48    |
| H(5A) | 2123 | 4017 | 890   | 61    |

|       |       |       |       |    |
|-------|-------|-------|-------|----|
| H(5B) | 2032  | 3478  | 1535  | 61 |
| H(6A) | -392  | 931   | -870  | 47 |
| H(6B) | -316  | 1026  | -127  | 47 |
| H(7)  | -404  | 3069  | -2467 | 72 |
| H(8A) | 1693  | -1006 | 1930  | 78 |
| H(8B) | 1195  | -358  | 2164  | 78 |
| H(9A) | -1049 | 5514  | 2794  | 76 |
| H(9B) | -1483 | 6254  | 3064  | 76 |

Table 10 Crystal data and structure refinement for **U3**,  $K_3[(UO_2)_2(OH)(Pt(CN)_4)_2] \cdot NO_3 \cdot 1.5H_2O$ .

|                                 |                                                                                                |
|---------------------------------|------------------------------------------------------------------------------------------------|
| Identification code             | U3                                                                                             |
| Empirical formula               | C16 H5 K3 N17 O14.50 Pt4 U4                                                                    |
| Formula weight                  | 2517.15                                                                                        |
| Temperature                     | 290(2) K                                                                                       |
| Wavelength                      | 0.71073 Å                                                                                      |
| Crystal system, space group     | Tetragonal, P 4/m b m                                                                          |
| Unit cell dimensions            | a = 22.1073(2) Å alpha = 90 °<br>b = 22.1073(2) Å beta = 90 °<br>c = 12.6202(2) Å gamma = 90 ° |
| Volume                          | 6167.90(13) Å ^3                                                                               |
| Z, Calculated density           | 4, 2.711 Mg/m^3                                                                                |
| Absorption coefficient          | 19.750 mm^-1                                                                                   |
| F(000)                          | 4292                                                                                           |
| Crystal size                    | 0.344 x 0.174 x 0.096 mm                                                                       |
| Theta range for data collection | 2.91 to 26.37 °.                                                                               |
| Limiting indices                | -27<=h<=27, -25<=k<=26, -15<=l<=15                                                             |
| Reflections collected / unique  | 6733 / 3423 [R(int) = 0.0564]                                                                  |
| Completeness to theta = 26.37   | 99.7 %                                                                                         |
| Absorption correction           | Semi-empirical from equivalents                                                                |
| Max. and min. transmission      | 1.00 and 0.31193                                                                               |
| Refinement method               | Full-matrix least-squares on F^2                                                               |

|                                      |                                       |
|--------------------------------------|---------------------------------------|
| Data / restraints / parameters       | 3423 / 55 / 146                       |
| Goodness-of-fit on $F^2$             | 1.058                                 |
| Final R indices [ $I > 2\sigma(I)$ ] | R1 = 0.0522, wR2 = 0.1500             |
| R indices (all data)                 | R1 = 0.0687, wR2 = 0.1562             |
| Largest diff. peak and hole          | 4.241 and -9.542 e. $\text{\AA}^{-3}$ |

Table 11. Atomic coordinates ( $\times 10^4$ ) and equivalent isotropic displacement parameters ( $\text{\AA}^2 \times 10^3$ ) for final.  $U(\text{eq})$  is defined as one third of the trace of the orthogonalized  $U^{ij}$  tensor.

–

|       | x       | y        | z         | $U(\text{eq})$ |
|-------|---------|----------|-----------|----------------|
| K(1)  | 607(3)  | 5607(3)  | 0         | 51(2)          |
| K(2)  | 3617(7) | 3695(7)  | -5000     | 152            |
| U(1)  | 2379(1) | 5072(1)  | -1713(1)  | 19(1)          |
| Pt(1) | 1464(1) | 6464(1)  | -5000     | 22(1)          |
| Pt(2) | 1234(1) | 3766(1)  | -5000     | 22(1)          |
| Pt(3) | 2432(1) | 2568(1)  | -1276(1)  | 15(1)          |
| C(1)  | 1902(7) | 6004(6)  | -3904(11) | 22(3)          |
| C(2)  | 1676(8) | 4216(7)  | -3896(12) | 26(3)          |
| C(3)  | 2423(7) | 3463(7)  | -1306(12) | 24(3)          |
| C(4)  | 3325(6) | 2575(7)  | -1294(11) | 20(3)          |
| N(1)  | 2118(7) | 5718(6)  | -3255(11) | 39(3)          |
| N(2)  | 1937(7) | 4471(7)  | -3235(11) | 39(3)          |
| N(3)  | 2409(7) | 3985(6)  | -1344(11) | 39(3)          |
| N(4)  | 2579(7) | 6157(6)  | -1344(11) | 38(3)          |
| N(5)  | 0       | 5000     | -2660(20) | 74(11)         |
| O(1)  | 1634(5) | 5159(5)  | -1214(9)  | 36(2)          |
| O(2)  | 3103(5) | 5001(5)  | -2198(9)  | 33(2)          |
| O(3)  | 2746(8) | 5044(7)  | 0         | 29(3)          |
| O(4)  | 0       | 5000     | -1682(19) | 55(5)          |
| O(5)  | 326(12) | 5326(12) | -3270(30) | 210(20)        |
| O(6)  | 728(10) | 4272(10) | 0         | 63(6)          |



O(7) 0 0 5000 56(12)

Table 12. Bond lengths [Å] and angles [°] for final.

---

|               |            |
|---------------|------------|
| K(1)-O(4)     | 2.848(19)  |
| K(1)-O(4)#1   | 2.848(19)  |
| K(1)-O(1)#2   | 2.912(12)  |
| K(1)-O(1)#3   | 2.912(12)  |
| K(1)-O(1)     | 2.912(12)  |
| K(1)-O(1)#4   | 2.912(12)  |
| K(1)-O(6)#1   | 2.96(3)    |
| K(1)-O(6)     | 2.96(3)    |
| K(1)-K(1)#1   | 3.80(2)    |
| U(1)-O(2)     | 1.720(12)  |
| U(1)-O(1)     | 1.774(12)  |
| U(1)-O(3)     | 2.310(6)   |
| U(1)-N(3)     | 2.449(14)  |
| U(1)-N(1)     | 2.482(13)  |
| U(1)-N(4)     | 2.483(14)  |
| U(1)-N(2)     | 2.531(14)  |
| Pt(1)-C(1)#5  | 1.971(15)  |
| Pt(1)-C(1)#4  | 1.971(15)  |
| Pt(1)-C(1)    | 1.971(15)  |
| Pt(1)-C(1)#6  | 1.971(15)  |
| Pt(2)-C(2)#7  | 1.971(15)  |
| Pt(2)-C(2)    | 1.971(15)  |
| Pt(2)-C(2)#8  | 1.971(15)  |
| Pt(2)-C(2)#6  | 1.971(15)  |
| Pt(3)-C(4)    | 1.975(14)  |
| Pt(3)-C(4)#8  | 1.975(14)  |
| Pt(3)-C(3)    | 1.978(15)  |
| Pt(3)-C(3)#8  | 1.978(15)  |
| Pt(3)-Pt(3)#2 | 3.2214(15) |
| C(1)-N(1)     | 1.139(19)  |
| C(2)-N(2)     | 1.16(2)    |
| C(3)-N(3)     | 1.16(2)    |

|                    |           |
|--------------------|-----------|
| C(4)-N(4)#9        | 1.15(2)   |
| N(4)-C(4)#10       | 1.15(2)   |
| N(5)-O(4)          | 1.238(18) |
| N(5)-O(5)#11       | 1.279(18) |
| N(5)-O(5)          | 1.279(18) |
| O(3)-U(1)#2        | 2.310(6)  |
| O(4)-K(1)#1        | 2.848(19) |
| O(6)-K(1)#1        | 2.96(3)   |
| O(4)-K(1)-O(4)#1   | 96.4(7)   |
| O(4)-K(1)-O(1)#2   | 126.8(3)  |
| O(4)#1-K(1)-O(1)#2 | 79.3(3)   |
| O(4)-K(1)-O(1)#3   | 126.8(3)  |
| O(4)#1-K(1)-O(1)#3 | 79.3(3)   |
| O(1)#2-K(1)-O(1)#3 | 104.7(5)  |
| O(4)-K(1)-O(1)     | 79.3(3)   |
| O(4)#1-K(1)-O(1)   | 126.8(3)  |
| O(1)#2-K(1)-O(1)   | 63.5(5)   |
| O(1)#3-K(1)-O(1)   | 143.8(6)  |
| O(4)-K(1)-O(1)#4   | 79.3(3)   |
| O(4)#1-K(1)-O(1)#4 | 126.8(3)  |
| O(1)#2-K(1)-O(1)#4 | 143.8(6)  |
| O(1)#3-K(1)-O(1)#4 | 63.5(5)   |
| O(1)-K(1)-O(1)#4   | 104.7(5)  |
| O(4)-K(1)-O(6)#1   | 64.7(3)   |
| O(4)#1-K(1)-O(6)#1 | 64.7(3)   |
| O(1)#2-K(1)-O(6)#1 | 143.8(3)  |
| O(1)#3-K(1)-O(6)#1 | 65.9(4)   |
| O(1)-K(1)-O(6)#1   | 143.8(3)  |
| O(1)#4-K(1)-O(6)#1 | 65.9(4)   |
| O(4)-K(1)-O(6)     | 64.7(3)   |
| O(4)#1-K(1)-O(6)   | 64.7(3)   |
| O(1)#2-K(1)-O(6)   | 65.9(4)   |
| O(1)#3-K(1)-O(6)   | 143.8(3)  |
| O(1)-K(1)-O(6)     | 65.9(4)   |
| O(1)#4-K(1)-O(6)   | 143.8(3)  |
| O(6)#1-K(1)-O(6)   | 100.3(9)  |

|                     |           |
|---------------------|-----------|
| O(4)-K(1)-K(1)#1    | 48.2(4)   |
| O(4)#1-K(1)-K(1)#1  | 48.2(4)   |
| O(1)#2-K(1)-K(1)#1  | 108.1(3)  |
| O(1)#3-K(1)-K(1)#1  | 108.1(3)  |
| O(1)-K(1)-K(1)#1    | 108.1(3)  |
| O(1)#4-K(1)-K(1)#1  | 108.1(3)  |
| O(6)#1-K(1)-K(1)#1  | 50.1(4)   |
| O(6)-K(1)-K(1)#1    | 50.1(4)   |
| O(2)-U(1)-O(1)      | 179.1(5)  |
| O(2)-U(1)-O(3)      | 90.2(5)   |
| O(1)-U(1)-O(3)      | 89.8(5)   |
| O(2)-U(1)-N(3)      | 87.3(5)   |
| O(1)-U(1)-N(3)      | 93.7(5)   |
| O(3)-U(1)-N(3)      | 77.6(5)   |
| O(2)-U(1)-N(1)      | 89.4(5)   |
| O(1)-U(1)-N(1)      | 90.0(5)   |
| O(3)-U(1)-N(1)      | 146.2(5)  |
| N(3)-U(1)-N(1)      | 136.1(5)  |
| O(2)-U(1)-N(4)      | 89.4(5)   |
| O(1)-U(1)-N(4)      | 89.7(5)   |
| O(3)-U(1)-N(4)      | 77.8(5)   |
| N(3)-U(1)-N(4)      | 155.1(5)  |
| N(1)-U(1)-N(4)      | 68.5(5)   |
| O(2)-U(1)-N(2)      | 92.3(5)   |
| O(1)-U(1)-N(2)      | 88.2(5)   |
| O(3)-U(1)-N(2)      | 146.2(5)  |
| N(3)-U(1)-N(2)      | 68.9(5)   |
| N(1)-U(1)-N(2)      | 67.5(5)   |
| N(4)-U(1)-N(2)      | 135.9(5)  |
| C(1)#5-Pt(1)-C(1)#4 | 89.1(8)   |
| C(1)#5-Pt(1)-C(1)   | 178.0(9)  |
| C(1)#4-Pt(1)-C(1)   | 90.8(8)   |
| C(1)#5-Pt(1)-C(1)#6 | 90.8(8)   |
| C(1)#4-Pt(1)-C(1)#6 | 178.0(9)  |
| C(1)-Pt(1)-C(1)#6   | 89.1(8)   |
| C(2)#7-Pt(2)-C(2)   | 179.3(10) |

|                      |           |
|----------------------|-----------|
| C(2)#7-Pt(2)-C(2)#8  | 90.0(8)   |
| C(2)-Pt(2)-C(2)#8    | 90.0(8)   |
| C(2)#7-Pt(2)-C(2)#6  | 90.0(8)   |
| C(2)-Pt(2)-C(2)#6    | 90.0(8)   |
| C(2)#8-Pt(2)-C(2)#6  | 179.3(10) |
| C(4)-Pt(3)-C(4)#8    | 90.8(9)   |
| C(4)-Pt(3)-C(3)      | 90.1(6)   |
| C(4)#8-Pt(3)-C(3)    | 178.0(6)  |
| C(4)-Pt(3)-C(3)#8    | 178.0(6)  |
| C(4)#8-Pt(3)-C(3)#8  | 90.1(6)   |
| C(3)-Pt(3)-C(3)#8    | 88.9(9)   |
| C(4)-Pt(3)-Pt(3)#2   | 90.6(4)   |
| C(4)#8-Pt(3)-Pt(3)#2 | 90.6(4)   |
| C(3)-Pt(3)-Pt(3)#2   | 91.1(4)   |
| C(3)#8-Pt(3)-Pt(3)#2 | 91.1(4)   |
| N(1)-C(1)-Pt(1)      | 175.3(15) |
| N(2)-C(2)-Pt(2)      | 178.8(15) |
| N(3)-C(3)-Pt(3)      | 178.3(15) |
| N(4)#9-C(4)-Pt(3)    | 177.5(13) |
| C(1)-N(1)-U(1)       | 168.5(15) |
| C(2)-N(2)-U(1)       | 172.8(15) |
| C(3)-N(3)-U(1)       | 171.4(13) |
| C(4)#10-N(4)-U(1)    | 166.7(13) |
| O(4)-N(5)-O(5)#11    | 127(2)    |
| O(4)-N(5)-O(5)       | 127(2)    |
| O(5)#11-N(5)-O(5)    | 106(5)    |
| U(1)-O(1)-K(1)       | 161.3(6)  |
| U(1)-O(3)-U(1)#2     | 138.7(8)  |
| N(5)-O(4)-K(1)       | 138.2(4)  |
| N(5)-O(4)-K(1)#1     | 138.2(4)  |
| K(1)-O(4)-K(1)#1     | 83.6(7)   |
| K(1)-O(6)-K(1)#1     | 79.7(9)   |

---

Symmetry transformations used to generate equivalent atoms:

#1 -x,-y+1,-z #2 x,y,-z #3 y-1/2,x+1/2,-z

#4 y-1/2,x+1/2,z #5 y-1/2,x+1/2,-z-1

#6 x,y,-z-1 #7 -y+1/2,-x+1/2,-z-1  
 #8 -y+1/2,-x+1/2,z #9 -y+1,x,z #10 y,-x+1,z  
 #11 -x,-y+1,z

Table 13. Anisotropic displacement parameters ( $\text{\AA}^2 \times 10^3$ ) for final. The anisotropic displacement factor exponent takes the form:  $-2\pi^2 [h^2 a^{*2}U^{11} + \dots + 2 h k a^* b^* U^{12}]$

|       | U <sup>11</sup> | U <sup>22</sup> | U <sup>33</sup> | U <sup>23</sup> | U <sup>13</sup> | U <sup>12</sup> |
|-------|-----------------|-----------------|-----------------|-----------------|-----------------|-----------------|
| K(1)  | 50(3)           | 50(3)           | 53(5)           | 0               | 0               | 5(4)            |
| U(1)  | 27(1)           | 11(1)           | 18(1)           | 0(1)            | -2(1)           | -1(1)           |
| Pt(1) | 25(1)           | 25(1)           | 14(1)           | 0               | 0               | 5(1)            |
| Pt(2) | 25(1)           | 25(1)           | 15(1)           | 0               | 0               | -8(1)           |
| Pt(3) | 11(1)           | 11(1)           | 23(1)           | 0(1)            | 0(1)            | 0(1)            |
| C(1)  | 36(9)           | 13(7)           | 17(6)           | -5(5)           | 0(6)            | -1(6)           |
| C(2)  | 36(9)           | 22(8)           | 21(7)           | 4(6)            | 2(6)            | -12(7)          |
| C(3)  | 24(8)           | 16(5)           | 33(8)           | -8(6)           | 1(7)            | 2(6)            |
| C(4)  | 9(6)            | 27(8)           | 24(7)           | 4(6)            | -5(5)           | -1(5)           |
| N(1)  | 55(10)          | 29(7)           | 33(6)           | 9(5)            | -12(6)          | 0(7)            |
| N(2)  | 53(9)           | 32(7)           | 30(6)           | -2(5)           | -11(6)          | -13(7)          |
| N(3)  | 58(10)          | 20(4)           | 39(7)           | 2(5)            | -10(7)          | 2(5)            |
| N(4)  | 55(10)          | 22(5)           | 36(7)           | 2(5)            | -8(7)           | -8(6)           |
| N(5)  | 86(17)          | 86(17)          | 48(10)          | 0               | 0               | 20(20)          |
| O(1)  | 31(5)           | 37(6)           | 41(6)           | -4(5)           | 1(4)            | 0(4)            |
| O(2)  | 34(5)           | 31(6)           | 35(5)           | 1(5)            | 1(4)            | 0(4)            |
| O(3)  | 36(8)           | 29(8)           | 22(5)           | 0               | 0               | -3(7)           |
| O(4)  | 61(8)           | 61(8)           | 45(10)          | 0               | 0               | -8(12)          |
| O(5)  | 240(30)         | 240(30)         | 140(30)         | 100(20)         | 100(20)         | 20(40)          |
| O(6)  | 54(8)           | 54(8)           | 83(18)          | 0               | 0               | -16(10)         |
| O(7)  | 72(19)          | 72(19)          | 22(17)          | 0               | 0               | 0               |

## References

- Sheldrick, G. M., SHELXTL PC, version 6.12, An Integrated System for Solving, Refining, and Displaying Crystal Structures from Diffraction Data; Siemens Analytical X-ray Instruments, Inc. Madison, WI, 2001.
- Oxford Diffraction (2009). Oxford Diffraction Ltd., Xcalibur CCD system, CrysAlisPro Software system, Version 1.171.33.
